# Supplementary material for: The Genomic Analysis of Erythrocyte microRNA Expression in Sickle Cell Diseases
Source: PLoS One. 2008 Jun 4;3(6):e2360. doi: 10.1371/journal.pone.0002360 (PMC2408759; doi:10.1371/journal.pone.0002360)
Supplement: Table S1 — The mRNA targets for miR-320 predicted by TargetScanS. (0.33 MB XLS) [file pone.0002360.s002.xls]

## Sheet: Sheet1
Target gene	Gene name	Total context score	Conserved sites				Poorly conserved sites
			total	8mer	7mer-m8	7mer-1A	total	8mer	7mer-m8	7mer-1A
YOD1	YOD1 OTU deubiquinating enzyme 1 homolog (S. cerevisiae)	-1.37	1	0	0	1	8	3	2	3
ONECUT2	one cut domain, family member 2	-1.03	3	0	0	3	7	3	1	3
ABHD13	abhydrolase domain containing 13	-0.99	1	0	1	0	4	2	2	0
RP11-35N6.1	plasticity related gene 3	-0.97	1	1	0	0	2	0	2	0
RIT1	Ras-like without CAAX 1	-0.84	1	0	0	1	2	2	0	0
PBX3	pre-B-cell leukemia homeobox 3	-0.79	2	2	0	0	0	0	0	0
CREB5	cAMP responsive element binding protein 5	-0.75	2	0	1	1	3	1	1	1
SEMA3A	sema domain, immunoglobulin domain (Ig), short basic domain, secreted, (semaphorin) 3A	-0.73	1	0	1	0	1	1	0	0
BMPR1A	bone morphogenetic protein receptor, type IA	-0.73	1	1	0	0	1	1	0	0
MLLT3	myeloid/lymphoid or mixed-lineage leukemia (trithorax homolog, Drosophila); translocated to, 3	-0.72	1	1	0	0	1	0	1	0
ESRRG	estrogen-related receptor gamma	-0.71	2	1	0	1	3	0	2	1
HELZ	helicase with zinc finger	-0.69	1	0	1	0	2	0	2	0
NXT2	nuclear transport factor 2-like export factor 2	-0.67	1	0	0	1	3	0	2	1
DNER	delta/notch-like EGF repeat containing	-0.67	1	0	1	0	1	1	0	0
CDK6	cyclin-dependent kinase 6	-0.66	1	1	0	0	4	0	2	2
MPPED2	metallophosphoesterase domain containing 2	-0.65	1	1	0	0	1	0	0	1
HRB	HIV-1 Rev binding protein	-0.65	1	0	0	1	3	0	2	1
ENAH	enabled homolog (Drosophila)	-0.64	1	0	1	0	3	0	3	0
ARHGAP5	Rho GTPase activating protein 5	-0.64	1	0	0	1	2	1	1	0
HECTD2	HECT domain containing 2	-0.64	1	0	1	0	2	0	2	0
CPD	carboxypeptidase D	-0.63	2	1	0	1	1	0	1	0
PCDHAC1	protocadherin alpha subfamily C, 1	-0.62	3	1	1	1	1	0	0	1
PCDHAC2	protocadherin alpha subfamily C, 2	-0.62	3	1	1	1	1	0	0	1
PCDHA1	protocadherin alpha 1	-0.62	3	1	1	1	1	0	0	1
PCDHA10	protocadherin alpha 10	-0.62	3	1	1	1	1	0	0	1
PCDHA12	protocadherin alpha 12	-0.62	3	1	1	1	1	0	0	1
PCDHA13	protocadherin alpha 13	-0.62	3	1	1	1	1	0	0	1
PCDHA2	protocadherin alpha 2	-0.62	3	1	1	1	1	0	0	1
PCDHA3	protocadherin alpha 3	-0.62	3	1	1	1	1	0	0	1
PCDHA4	protocadherin alpha 4	-0.62	3	1	1	1	1	0	0	1
PCDHA5	protocadherin alpha 5	-0.62	3	1	1	1	1	0	0	1
PCDHA6	protocadherin alpha 6	-0.62	3	1	1	1	1	0	0	1
PCDHA7	protocadherin alpha 7	-0.62	3	1	1	1	1	0	0	1
PCDHA8	protocadherin alpha 8	-0.62	3	1	1	1	1	0	0	1
AFF4	AF4/FMR2 family, member 4	-0.61	1	0	1	0	2	1	0	1
USP25	ubiquitin specific peptidase 25	-0.6	1	0	1	0	1	0	1	0
ARL8B	ADP-ribosylation factor-like 8B	-0.59	1	1	0	0	1	0	0	1
PCGF5	polycomb group ring finger 5	-0.58	2	0	0	2	3	1	1	1
LOC339745	hypothetical protein LOC339745	-0.58	1	1	0	0	1	0	0	1
MTMR12	myotubularin related protein 12	-0.56	1	0	0	1	1	1	0	0
USP12	ubiquitin specific peptidase 12	-0.56	1	1	0	0	0	0	0	0
KIAA1189	KIAA1189	-0.55	1	0	0	1	1	1	0	0
ARPP-19	cyclic AMP phosphoprotein, 19 kD	-0.55	2	1	1	0	0	0	0	0
ATP11A	ATPase, Class VI, type 11A	-0.55	1	0	0	1	1	0	1	0
TMEM47	transmembrane protein 47	-0.54	1	0	1	0	1	1	0	0
PAPD5	PAP associated domain containing 5	-0.54	1	1	0	0	2	1	1	0
MTDH	metadherin	-0.54	2	1	1	0	0	0	0	0
LMO3	LIM domain only 3 (rhombotin-like 2)	-0.54	1	1	0	0	1	0	0	1
DHDDS	dehydrodolichyl diphosphate synthase	-0.54	1	1	0	0	1	0	1	0
FAM70A	family with sequence similarity 70, member A	-0.53	2	0	1	1	1	0	1	0
GCNT4	glucosaminyl (N-acetyl) transferase 4, core 2 (beta-1,6-N-acetylglucosaminyltransferase)	-0.52	1	0	1	0	1	0	1	0
CDC2L5	cell division cycle 2-like 5 (cholinesterase-related cell division controller)	-0.52	1	1	0	0	0	0	0	0
CGGBP1	CGG triplet repeat binding protein 1	-0.5	1	0	0	1	3	0	3	0
NRK	Nik related kinase	-0.5	1	1	0	0	1	0	0	1
NARG1	NMDA receptor regulated 1	-0.5	1	1	0	0	0	0	0	0
ALS2CR13	amyotrophic lateral sclerosis 2 (juvenile) chromosome region, candidate 13	-0.48	2	0	1	1	3	0	3	0
DAZAP1	DAZ associated protein 1	-0.48	1	1	0	0	0	0	0	0
PFKM	phosphofructokinase, muscle	-0.48	1	0	0	1	1	1	0	0
E2F7	E2F transcription factor 7	-0.47	2	0	0	2	1	0	1	0
PNN	pinin, desmosome associated protein	-0.47	1	0	1	0	2	0	1	1
TROVE2	TROVE domain family, member 2	-0.47	1	0	1	0	1	0	1	0
RASA1	RAS p21 protein activator (GTPase activating protein) 1	-0.47	1	1	0	0	0	0	0	0
GNAI1	guanine nucleotide binding protein (G protein), alpha inhibiting activity polypeptide 1	-0.47	1	1	0	0	0	0	0	0
COPS2	COP9 constitutive photomorphogenic homolog subunit 2 (Arabidopsis)	-0.47	1	1	0	0	0	0	0	0
PLEKHA5	pleckstrin homology domain containing, family A member 5	-0.46	1	1	0	0	0	0	0	0
MAGI1	membrane associated guanylate kinase, WW and PDZ domain containing 1	-0.46	1	0	0	1	2	0	1	1
PCDH19	protocadherin 19	-0.46	1	1	0	0	1	0	0	1
KCNS3	potassium voltage-gated channel, delayed-rectifier, subfamily S, member 3	-0.46	1	1	0	0	0	0	0	0
KLF5	Kruppel-like factor 5 (intestinal)	-0.46	1	1	0	0	0	0	0	0
TMEM106B	transmembrane protein 106B	-0.45	1	1	0	0	1	0	0	1
PPM1A	protein phosphatase 1A (formerly 2C), magnesium-dependent, alpha isoform	-0.45	1	1	0	0	1	0	0	1
TMEM64	transmembrane protein 64	-0.45	2	1	0	1	0	0	0	0
PTEN	phosphatase and tensin homolog (mutated in multiple advanced cancers 1)	-0.44	1	1	0	0	0	0	0	0
DHX15	DEAH (Asp-Glu-Ala-His) box polypeptide 15	-0.44	1	1	0	0	0	0	0	0
HIVEP2	human immunodeficiency virus type I enhancer binding protein 2	-0.44	2	0	1	1	0	0	0	0
N4BP1	Nedd4 binding protein 1	-0.43	1	0	1	0	2	0	2	0
CNOT6	CCR4-NOT transcription complex, subunit 6	-0.43	1	0	0	1	4	2	1	1
SEC63	SEC63 homolog (S. cerevisiae)	-0.43	1	1	0	0	0	0	0	0
SFRS7	splicing factor, arginine/serine-rich 7, 35kDa	-0.43	2	0	1	1	1	0	1	0
TFAP2B	transcription factor AP-2 beta (activating enhancer binding protein 2 beta)	-0.43	1	0	0	1	3	1	2	0
LHFPL3	lipoma HMGIC fusion partner-like 3	-0.42	1	0	0	1	1	0	1	0
TDG	thymine-DNA glycosylase	-0.42	1	0	1	0	1	0	0	1
RAB14	RAB14, member RAS oncogene family	-0.42	1	0	0	1	1	1	0	0
MN1	meningioma (disrupted in balanced translocation) 1	-0.42	1	1	0	0	0	0	0	0
SMAP1	stromal membrane-associated protein 1	-0.41	1	0	1	0	1	0	1	0
RAI2	retinoic acid induced 2	-0.41	1	1	0	0	0	0	0	0
CAMSAP1L1	calmodulin regulated spectrin-associated protein 1-like 1	-0.41	1	0	1	0	1	0	1	0
KLF13	Kruppel-like factor 13	-0.41	1	1	0	0	1	0	1	0
EIF3S1	eukaryotic translation initiation factor 3, subunit 1 alpha, 35kDa	-0.41	1	1	0	0	0	0	0	0
GABPB2	GA binding protein transcription factor, beta subunit 2	-0.41	1	1	0	0	0	0	0	0
CDH20	cadherin 20, type 2	-0.4	1	1	0	0	0	0	0	0
USP46	ubiquitin specific peptidase 46	-0.4	1	0	0	1	1	0	1	0
KIAA1600	KIAA1600	-0.4	1	0	1	0	1	0	0	1
PALM2	paralemmin 2	-0.4	1	1	0	0	0	0	0	0
ELL2	elongation factor, RNA polymerase II, 2	-0.4	1	1	0	0	0	0	0	0
ZC3H7B	zinc finger CCCH-type containing 7B	-0.4	1	1	0	0	2	0	1	1
FAM63B	family with sequence similarity 63, member B	-0.4	1	1	0	0	0	0	0	0
KIAA0831	KIAA0831	-0.4	1	0	1	0	1	0	1	0
NPAS2	neuronal PAS domain protein 2	-0.39	1	1	0	0	0	0	0	0
PAN3	PAN3 polyA specific ribonuclease subunit homolog (S. cerevisiae)	-0.39	2	1	0	1	0	0	0	0
NRP1	neuropilin 1	-0.39	1	1	0	0	1	0	1	0
LOC399818	similar to CG9643-PA	-0.39	1	0	1	0	1	0	1	0
ING5	inhibitor of growth family, member 5	-0.39	1	1	0	0	0	0	0	0
STAG2	stromal antigen 2	-0.38	2	0	1	1	0	0	0	0
C10orf97	chromosome 10 open reading frame 97	-0.38	1	0	0	1	1	0	1	0
FOXQ1	forkhead box Q1	-0.38	1	1	0	0	0	0	0	0
TSC1	tuberous sclerosis 1	-0.37	3	1	2	0	1	0	0	1
MXI1	MAX interactor 1	-0.37	2	0	1	1	1	0	0	1
BANP	BTG3 associated nuclear protein	-0.37	1	0	1	0	0	0	0	0
SEMA6D	sema domain, transmembrane domain (TM), and cytoplasmic domain, (semaphorin) 6D	-0.36	1	0	1	0	1	0	1	0
TNPO1	transportin 1	-0.36	1	0	0	1	2	0	1	1
LOC84661	dpy-30-like protein	-0.36	1	1	0	0	0	0	0	0
PPM1B	protein phosphatase 1B (formerly 2C), magnesium-dependent, beta isoform	-0.36	1	0	1	0	1	0	1	0
IGF2BP3	insulin-like growth factor 2 mRNA binding protein 3	-0.36	1	1	0	0	1	0	0	1
VPS37B	vacuolar protein sorting 37 homolog B (S. cerevisiae)	-0.36	1	1	0	0	0	0	0	0
AP3M1	adaptor-related protein complex 3, mu 1 subunit	-0.35	1	0	1	0	1	0	0	1
PPP2R2C	protein phosphatase 2 (formerly 2A), regulatory subunit B, gamma isoform	-0.35	1	0	1	0	1	0	1	0
ARMC1	armadillo repeat containing 1	-0.34	1	1	0	0	0	0	0	0
ARMCX2	armadillo repeat containing, X-linked 2	-0.34	1	1	0	0	0	0	0	0
NAP1L5	nucleosome assembly protein 1-like 5	-0.34	1	1	0	0	0	0	0	0
EREG	epiregulin	-0.34	1	0	1	0	0	0	0	0
TIPARP	TCDD-inducible poly(ADP-ribose) polymerase	-0.33	1	0	0	1	1	0	1	0
ATRX	alpha thalassemia/mental retardation syndrome X-linked (RAD54 homolog, S. cerevisiae)	-0.33	2	0	2	0	1	0	0	1
NEBL	nebulette	-0.33	1	0	0	1	1	0	1	0
KIAA1128	KIAA1128	-0.33	1	0	0	1	2	0	1	1
BNIP3L	BCL2/adenovirus E1B 19kDa interacting protein 3-like	-0.33	2	0	0	2	2	0	1	1
AIM1	absent in melanoma 1	-0.33	1	0	1	0	1	0	0	1
PAK7	p21(CDKN1A)-activated kinase 7	-0.33	1	1	0	0	0	0	0	0
RBMS3	RNA binding motif, single stranded interacting protein	-0.32	1	0	1	0	1	0	0	1
ALG9	asparagine-linked glycosylation 9 homolog (S. cerevisiae, alpha- 1,2-mannosyltransferase)	-0.32	1	1	0	0	0	0	0	0
ANKRD13A	ankyrin repeat domain 13A	-0.32	1	1	0	0	0	0	0	0
RFXDC2	regulatory factor X domain containing 2	-0.32	1	0	1	0	1	0	1	0
MIER1	mesoderm induction early response 1 homolog (Xenopus laevis)	-0.31	2	0	1	1	1	0	0	1
ANGPTL1	angiopoietin-like 1	-0.31	1	1	0	0	0	0	0	0
TPD52L2	tumor protein D52-like 2	-0.31	1	1	0	0	1	0	0	1
RKHD3	ring finger and KH domain containing 3	-0.31	1	1	0	0	0	0	0	0
TMEM108	transmembrane protein 108	-0.31	1	0	1	0	0	0	0	0
ZFP91	zinc finger protein 91 homolog (mouse)	-0.31	1	0	1	0	0	0	0	0
ZNF3	zinc finger protein 3	-0.3	1	1	0	0	0	0	0	0
MCL1	myeloid cell leukemia sequence 1 (BCL2-related)	-0.3	1	0	1	0	1	0	1	0
TSC22D4	TSC22 domain family, member 4	-0.3	1	1	0	0	0	0	0	0
PHF1	PHD finger protein 1	-0.3	1	0	1	0	0	0	0	0
RAD18	RAD18 homolog (S. cerevisiae)	-0.3	1	0	1	0	1	0	1	0
ITGB1	integrin, beta 1 (fibronectin receptor, beta polypeptide, antigen CD29 includes MDF2, MSK12)	-0.3	1	0	0	1	2	0	0	2
NPC1	Niemann-Pick disease, type C1	-0.29	1	0	0	1	1	0	1	0
LOC153222	adult retina protein	-0.29	1	1	0	0	1	0	0	1
MIER3	mesoderm induction early response 1, family member 3	-0.29	1	1	0	0	0	0	0	0
EYA4	eyes absent homolog 4 (Drosophila)	-0.29	1	1	0	0	0	0	0	0
XBP1	X-box binding protein 1	-0.29	1	0	1	0	0	0	0	0
DLGAP4	discs, large (Drosophila) homolog-associated protein 4	-0.29	1	1	0	0	0	0	0	0
SUHW3	suppressor of hairy wing homolog 3 (Drosophila)	-0.29	1	0	1	0	0	0	0	0
MRPS25	mitochondrial ribosomal protein S25	-0.29	1	0	1	0	1	0	1	0
FLRT3	fibronectin leucine rich transmembrane protein 3	-0.28	1	0	1	0	0	0	0	0
CALD1	caldesmon 1	-0.28	1	0	1	0	1	0	0	1
RAP1A	RAP1A, member of RAS oncogene family	-0.28	1	0	1	0	0	0	0	0
LOC728215	similar to transmembrane protein 28	-0.28	1	0	1	0	0	0	0	0
POGZ	pogo transposable element with ZNF domain	-0.28	1	0	1	0	1	0	1	0
ZIC3	Zic family member 3 heterotaxy 1 (odd-paired homolog, Drosophila)	-0.28	1	0	1	0	0	0	0	0
C16orf44	chromosome 16 open reading frame 44	-0.28	1	0	1	0	0	0	0	0
TMEM2	transmembrane protein 2	-0.28	1	1	0	0	0	0	0	0
SLITRK3	SLIT and NTRK-like family, member 3	-0.27	1	0	1	0	0	0	0	0
C14orf147	chromosome 14 open reading frame 147	-0.27	1	0	1	0	0	0	0	0
AZIN1	antizyme inhibitor 1	-0.27	1	0	1	0	0	0	0	0
ZBTB33	zinc finger and BTB domain containing 33	-0.27	1	0	0	1	1	0	1	0
PCSK7	proprotein convertase subtilisin/kexin type 7	-0.27	1	0	1	0	0	0	0	0
MMP16	matrix metallopeptidase 16 (membrane-inserted)	-0.27	2	0	2	0	2	0	1	1
CUTL1	cut-like 1, CCAAT displacement protein (Drosophila)	-0.27	2	0	1	1	0	0	0	0
PCMTD1	protein-L-isoaspartate (D-aspartate) O-methyltransferase domain containing 1	-0.27	1	0	0	1	1	0	0	1
PPARGC1A	peroxisome proliferator-activated receptor gamma, coactivator 1 alpha	-0.27	1	0	1	0	1	0	1	0
ZNF281	zinc finger protein 281	-0.27	2	0	1	1	0	0	0	0
ZCCHC2	zinc finger, CCHC domain containing 2	-0.27	1	0	0	1	1	0	1	0
GPATCH8	G patch domain containing 8	-0.27	1	1	0	0	0	0	0	0
CAB39	calcium binding protein 39	-0.27	1	0	1	0	1	0	0	1
RHOBTB1	Rho-related BTB domain containing 1	-0.26	1	0	1	0	0	0	0	0
DBN1	drebrin 1	-0.26	1	0	1	0	0	0	0	0
LOC440742	hypothetical gene supported by AK124614	-0.26	1	0	1	0	1	0	1	0
INA	internexin neuronal intermediate filament protein, alpha	-0.26	1	0	1	0	0	0	0	0
ACTL6A	actin-like 6A	-0.26	1	0	0	1	1	0	0	1
B4GALT6	UDP-Gal:betaGlcNAc beta 1,4- galactosyltransferase, polypeptide 6	-0.26	1	0	0	1	1	0	1	0
DRB1	developmentally regulated RNA-binding protein 1	-0.26	1	0	1	0	0	0	0	0
RP11-130N24.1	KIAA2022 protein	-0.25	2	0	1	1	1	0	1	0
SATB2	SATB homeobox 2	-0.25	1	1	0	0	0	0	0	0
CLCN5	chloride channel 5 (nephrolithiasis 2, X-linked, Dent disease)	-0.25	1	0	1	0	1	0	0	1
C14orf32	chromosome 14 open reading frame 32	-0.25	1	0	1	0	1	0	0	1
GABRA1	gamma-aminobutyric acid (GABA) A receptor, alpha 1	-0.25	1	0	0	1	1	0	0	1
TSGA14	testis specific, 14	-0.25	1	0	0	1	2	0	2	0
CNOT7	CCR4-NOT transcription complex, subunit 7	-0.25	1	1	0	0	0	0	0	0
CGN	cingulin	-0.25	1	0	0	1	1	0	1	0
TMCC1	transmembrane and coiled-coil domain family 1	-0.25	1	0	0	1	1	0	1	0
FAM49B	family with sequence similarity 49, member B	-0.25	1	0	1	0	0	0	0	0
TNRC6B	trinucleotide repeat containing 6B	-0.25	1	0	1	0	3	1	0	2
MAPK8IP3	mitogen-activated protein kinase 8 interacting protein 3	-0.25	1	0	1	0	0	0	0	0
STC1	stanniocalcin 1	-0.25	2	0	0	2	0	0	0	0
SOX4	SRY (sex determining region Y)-box 4	-0.25	1	0	0	1	1	0	1	0
MAT2A	methionine adenosyltransferase II, alpha	-0.24	1	0	1	0	0	0	0	0
DAG1	dystroglycan 1 (dystrophin-associated glycoprotein 1)	-0.24	1	0	1	0	0	0	0	0
ZNF664	zinc finger protein 664	-0.24	2	0	0	2	0	0	0	0
CPEB3	cytoplasmic polyadenylation element binding protein 3	-0.24	1	0	0	1	1	0	0	1
MAPK1	mitogen-activated protein kinase 1	-0.24	1	0	1	0	1	0	1	0
DTNA	dystrobrevin, alpha	-0.24	1	1	0	0	0	0	0	0
PALLD	palladin, cytoskeletal associated protein	-0.24	1	0	1	0	0	0	0	0
SERBP1	SERPINE1 mRNA binding protein 1	-0.24	1	1	0	0	0	0	0	0
A2BP1	ataxin 2-binding protein 1	-0.24	1	0	1	0	1	0	0	1
TOMM70A	translocase of outer mitochondrial membrane 70 homolog A (S. cerevisiae)	-0.24	1	0	1	0	1	0	0	1
XPO1	exportin 1 (CRM1 homolog, yeast)	-0.24	1	0	1	0	0	0	0	0
CDH2	cadherin 2, type 1, N-cadherin (neuronal)	-0.23	1	0	1	0	0	0	0	0
PLK3	polo-like kinase 3 (Drosophila)	-0.23	1	1	0	0	0	0	0	0
SMG7	Smg-7 homolog, nonsense mediated mRNA decay factor (C. elegans)	-0.23	1	0	1	0	0	0	0	0
ZNF652	zinc finger protein 652	-0.23	1	0	1	0	0	0	0	0
CAMTA1	calmodulin binding transcription activator 1	-0.23	1	0	1	0	1	0	1	0
ZNF148	zinc finger protein 148	-0.23	1	0	1	0	1	0	0	1
GSPT2	G1 to S phase transition 2	-0.23	1	0	1	0	0	0	0	0
ARPC5	actin related protein 2/3 complex, subunit 5, 16kDa	-0.23	1	0	1	0	0	0	0	0
ANKFY1	ankyrin repeat and FYVE domain containing 1	-0.23	1	0	0	1	1	0	1	0
P18SRP	P18SRP protein	-0.23	1	0	0	1	1	0	0	1
YES1	v-yes-1 Yamaguchi sarcoma viral oncogene homolog 1	-0.23	1	0	1	0	0	0	0	0
AHCYL1	S-adenosylhomocysteine hydrolase-like 1	-0.23	1	0	0	1	1	0	0	1
IGF1R	insulin-like growth factor 1 receptor	-0.22	2	0	1	1	1	0	1	0
UBE2D3	ubiquitin-conjugating enzyme E2D 3 (UBC4/5 homolog, yeast)	-0.22	1	0	1	0	1	0	0	1
HIAT1	hippocampus abundant transcript 1	-0.22	1	0	0	1	1	0	0	1
PRKG1	protein kinase, cGMP-dependent, type I	-0.22	1	0	1	0	0	0	0	0
TRAF7	TNF receptor-associated factor 7	-0.22	1	0	1	0	0	0	0	0
TFRC	transferrin receptor (p90, CD71)	-0.22	1	0	1	0	0	0	0	0
QSER1	glutamine and serine rich 1	-0.22	1	0	0	1	1	0	1	0
NONO	non-POU domain containing, octamer-binding	-0.22	1	0	1	0	0	0	0	0
TIAM1	T-cell lymphoma invasion and metastasis 1	-0.22	2	0	0	2	0	0	0	0
SOBP	sine oculis binding protein homolog (Drosophila)	-0.22	1	0	1	0	0	0	0	0
HOXB4	homeobox B4	-0.22	1	0	1	0	1	0	0	1
PARD6B	par-6 partitioning defective 6 homolog beta (C. elegans)	-0.22	1	0	0	1	0	0	0	0
CBL	Cas-Br-M (murine) ecotropic retroviral transforming sequence	-0.21	1	0	0	1	2	0	0	2
HNRPC	heterogeneous nuclear ribonucleoprotein C (C1/C2)	-0.21	1	0	1	0	0	0	0	0
SLC10A3	solute carrier family 10 (sodium/bile acid cotransporter family), member 3	-0.21	1	0	1	0	0	0	0	0
DCBLD2	discoidin, CUB and LCCL domain containing 2	-0.21	1	0	0	1	2	0	0	2
TWF1	twinfilin, actin-binding protein, homolog 1 (Drosophila)	-0.21	1	0	1	0	0	0	0	0
BLCAP	bladder cancer associated protein	-0.21	2	0	0	2	0	0	0	0
PPP1R16B	protein phosphatase 1, regulatory (inhibitor) subunit 16B	-0.21	1	0	1	0	1	0	1	0
MITF	microphthalmia-associated transcription factor	-0.21	1	0	0	1	1	0	1	0
MUC13	mucin 13, cell surface associated	-0.21	1	0	1	0	0	0	0	0
PCSK1	proprotein convertase subtilisin/kexin type 1	-0.21	1	0	0	1	0	0	0	0
LRCH2	leucine-rich repeats and calponin homology (CH) domain containing 2	-0.21	1	0	1	0	0	0	0	0
ZNF650	zinc finger protein 650	-0.21	1	0	0	1	0	0	0	0
MGC39715	hypothetical protein MGC39715	-0.2	1	0	0	1	0	0	0	0
POU3F2	POU domain, class 3, transcription factor 2	-0.2	1	0	0	1	1	0	1	0
HSPH1	heat shock 105kDa/110kDa protein 1	-0.2	1	0	0	1	0	0	0	0
SUV420H1	suppressor of variegation 4-20 homolog 1 (Drosophila)	-0.2	1	0	1	0	0	0	0	0
SPCS2	signal peptidase complex subunit 2 homolog (S. cerevisiae)	-0.2	1	0	1	0	0	0	0	0
LOC653566	similar to Signal peptidase complex subunit 2 (Microsomal signal peptidase 25 kDa subunit) (SPase 25 kDa subunit)	-0.2	1	0	1	0	0	0	0	0
SH3RF1	SH3 domain containing ring finger 1	-0.2	1	0	1	0	0	0	0	0
DAB2	disabled homolog 2, mitogen-responsive phosphoprotein (Drosophila)	-0.2	1	0	1	0	0	0	0	0
FBXO33	F-box protein 33	-0.2	1	0	0	1	0	0	0	0
GSPT1	G1 to S phase transition 1	-0.2	1	0	1	0	0	0	0	0
ATP6V1A	ATPase, H+ transporting, lysosomal 70kDa, V1 subunit A	-0.2	1	0	1	0	0	0	0	0
CTNNB1	catenin (cadherin-associated protein), beta 1, 88kDa	-0.2	1	0	1	0	0	0	0	0
KIAA0368	KIAA0368	-0.2	1	0	0	1	0	0	0	0
ONECUT1	one cut domain, family member 1	-0.2	1	0	0	1	0	0	0	0
ARID5B	AT rich interactive domain 5B (MRF1-like)	-0.2	1	0	1	0	1	0	1	0
STK24	serine/threonine kinase 24 (STE20 homolog, yeast)	-0.19	1	0	0	1	1	0	1	0
PMPCB	peptidase (mitochondrial processing) beta	-0.19	1	0	1	0	0	0	0	0
TBC1D15	TBC1 domain family, member 15	-0.19	1	0	0	1	0	0	0	0
CPEB1	cytoplasmic polyadenylation element binding protein 1	-0.19	1	0	1	0	0	0	0	0
C11orf9	chromosome 11 open reading frame 9	-0.19	1	0	0	1	1	0	1	0
HERPUD1	homocysteine-inducible, endoplasmic reticulum stress-inducible, ubiquitin-like domain member 1	-0.19	1	0	0	1	0	0	0	0
NEGR1	neuronal growth regulator 1	-0.19	1	1	0	0	0	0	0	0
RAB18	RAB18, member RAS oncogene family	-0.19	1	0	1	0	0	0	0	0
FKBP1A	FK506 binding protein 1A, 12kDa	-0.19	1	0	1	0	0	0	0	0
CLASP1	cytoplasmic linker associated protein 1	-0.19	1	0	1	0	0	0	0	0
TAF5	TAF5 RNA polymerase II, TATA box binding protein (TBP)-associated factor, 100kDa	-0.19	1	0	1	0	0	0	0	0
HIPK3	homeodomain interacting protein kinase 3	-0.19	1	0	0	1	0	0	0	0
PIK3CA	phosphoinositide-3-kinase, catalytic, alpha polypeptide	-0.19	1	0	0	1	0	0	0	0
DLG2	discs, large homolog 2, chapsyn-110 (Drosophila)	-0.18	1	0	0	1	1	1	0	0
2007-09-15	15 kDa selenoprotein	-0.18	1	0	1	0	0	0	0	0
HSPA4	heat shock 70kDa protein 4	-0.18	1	0	0	1	0	0	0	0
C8ORFK32	C8orfK32 protein	-0.18	1	0	0	1	2	0	1	1
TNKS2	tankyrase, TRF1-interacting ankyrin-related ADP-ribose polymerase 2	-0.18	1	0	0	1	0	0	0	0
C15orf24	chromosome 15 open reading frame 24	-0.18	1	0	1	0	0	0	0	0
ABCA12	ATP-binding cassette, sub-family A (ABC1), member 12	-0.18	1	0	1	0	0	0	0	0
POLE4	polymerase (DNA-directed), epsilon 4 (p12 subunit)	-0.18	1	0	1	0	0	0	0	0
ProSAPiP1	ProSAPiP1 protein	-0.18	1	0	1	0	0	0	0	0
LRRC4	leucine rich repeat containing 4	-0.18	1	0	0	1	0	0	0	0
PLXNC1	plexin C1	-0.18	1	0	1	0	0	0	0	0
TCEA1	transcription elongation factor A (SII), 1	-0.17	1	0	0	1	1	0	0	1
YWHAQ	tyrosine 3-monooxygenase/tryptophan 5-monooxygenase activation protein, theta polypeptide	-0.17	1	0	1	0	0	0	0	0
CHMP4C	chromatin modifying protein 4C	-0.17	1	0	0	1	0	0	0	0
TNKS	tankyrase, TRF1-interacting ankyrin-related ADP-ribose polymerase	-0.17	1	0	1	0	1	0	0	1
DR1	down-regulator of transcription 1, TBP-binding (negative cofactor 2)	-0.17	2	0	0	2	0	0	0	0
GNS	glucosamine (N-acetyl)-6-sulfatase (Sanfilippo disease IIID)	-0.17	1	1	0	0	1	0	0	1
DMD	dystrophin (muscular dystrophy, Duchenne and Becker types)	-0.17	2	0	0	2	0	0	0	0
NAT5	N-acetyltransferase 5	-0.17	1	0	0	1	0	0	0	0
ARID2	AT rich interactive domain 2 (ARID, RFX-like)	-0.17	1	0	0	1	0	0	0	0
FXR1	fragile X mental retardation, autosomal homolog 1	-0.17	1	0	0	1	0	0	0	0
FLJ20152	hypothetical protein FLJ20152	-0.17	1	0	0	1	0	0	0	0
ARL4A	ADP-ribosylation factor-like 4A	-0.17	2	0	0	2	0	0	0	0
YWHAE	tyrosine 3-monooxygenase/tryptophan 5-monooxygenase activation protein, epsilon polypeptide	-0.16	1	0	1	0	0	0	0	0
ELOVL6	ELOVL family member 6, elongation of long chain fatty acids (FEN1/Elo2, SUR4/Elo3-like, yeast)	-0.16	1	0	0	1	0	0	0	0
KIAA1826	KIAA1826	-0.16	1	0	0	1	1	0	0	1
ADIPOR1	adiponectin receptor 1	-0.16	1	0	0	1	0	0	0	0
UNC5A	unc-5 homolog A (C. elegans)	-0.16	1	0	1	0	0	0	0	0
ULK1	unc-51-like kinase 1 (C. elegans)	-0.16	1	0	1	0	1	0	1	0
CSNK1E	casein kinase 1, epsilon	-0.16	1	0	0	1	0	0	0	0
FTL	ferritin, light polypeptide	-0.16	1	0	1	0	0	0	0	0
ZHX1	zinc fingers and homeoboxes 1	-0.16	1	0	0	1	0	0	0	0
FLRT2	fibronectin leucine rich transmembrane protein 2	-0.16	1	0	0	1	1	0	1	0
FOXC1	forkhead box C1	-0.16	1	0	0	1	0	0	0	0
KIAA1217	KIAA1217	-0.16	1	0	0	1	0	0	0	0
FBXO11	F-box protein 11	-0.16	1	0	1	0	0	0	0	0
ITSN2	intersectin 2	-0.16	1	0	0	1	0	0	0	0
TRAP1	TNF receptor-associated protein 1	-0.16	1	0	0	1	0	0	0	0
RBBP6	retinoblastoma binding protein 6	-0.16	1	0	0	1	0	0	0	0
PHOX2B	paired-like homeobox 2b	-0.16	1	0	1	0	0	0	0	0
JARID1A	jumonji, AT rich interactive domain 1A	-0.15	1	0	1	0	1	0	1	0
SPRED2	sprouty-related, EVH1 domain containing 2	-0.15	1	0	1	0	0	0	0	0
PARD6G	par-6 partitioning defective 6 homolog gamma (C. elegans)	-0.15	1	0	0	1	0	0	0	0
AMPD3	adenosine monophosphate deaminase (isoform E)	-0.15	1	0	0	1	0	0	0	0
FLJ45187	hypothetical protein LOC387640	-0.15	1	0	0	1	0	0	0	0
SUCLA2	succinate-CoA ligase, ADP-forming, beta subunit	-0.15	1	0	0	1	0	0	0	0
ENPP4	ectonucleotide pyrophosphatase/phosphodiesterase 4 (putative function)	-0.15	1	0	0	1	0	0	0	0
TPD52	tumor protein D52	-0.15	1	0	0	1	0	0	0	0
LCORL	ligand dependent nuclear receptor corepressor-like	-0.15	1	0	0	1	0	0	0	0
BHLHB2	basic helix-loop-helix domain containing, class B, 2	-0.15	1	0	1	0	0	0	0	0
RUNX1	runt-related transcription factor 1 (acute myeloid leukemia 1; aml1 oncogene)	-0.15	1	0	1	0	0	0	0	0
SDHC	succinate dehydrogenase complex, subunit C, integral membrane protein, 15kDa	-0.15	1	0	1	0	0	0	0	0
IPO7	importin 7	-0.15	1	0	1	0	0	0	0	0
CLASP2	cytoplasmic linker associated protein 2	-0.15	1	0	0	1	0	0	0	0
CFL2	cofilin 2 (muscle)	-0.15	1	0	0	1	0	0	0	0
NR4A2	nuclear receptor subfamily 4, group A, member 2	-0.14	1	0	1	0	0	0	0	0
EDG1	endothelial differentiation, sphingolipid G-protein-coupled receptor, 1	-0.14	1	0	0	1	0	0	0	0
LRRTM1	leucine rich repeat transmembrane neuronal 1	-0.14	1	0	0	1	0	0	0	0
SOCS4	suppressor of cytokine signaling 4	-0.14	1	0	0	1	1	0	0	1
FIGN	fidgetin	-0.14	1	0	0	1	0	0	0	0
DHX40	DEAH (Asp-Glu-Ala-His) box polypeptide 40	-0.14	1	0	0	1	0	0	0	0
FBXO28	F-box protein 28	-0.14	1	0	0	1	0	0	0	0
RAP2A	RAP2A, member of RAS oncogene family	-0.14	2	0	0	2	0	0	0	0
WRNIP1	Werner helicase interacting protein 1	-0.14	1	0	1	0	0	0	0	0
SORCS1	sortilin-related VPS10 domain containing receptor 1	-0.14	1	0	0	1	1	0	1	0
SRRM1	serine/arginine repetitive matrix 1	-0.14	1	0	0	1	0	0	0	0
BHLHB5	basic helix-loop-helix domain containing, class B, 5	-0.14	1	0	0	1	0	0	0	0
CCND2	cyclin D2	-0.13	1	0	0	1	1	0	1	0
RAP2C	RAP2C, member of RAS oncogene family	-0.13	1	1	0	0	0	0	0	0
TMEM9B	TMEM9 domain family, member B	-0.13	1	0	1	0	0	0	0	0
RHOG	ras homolog gene family, member G (rho G)	-0.13	1	0	1	0	0	0	0	0
ACOT7	acyl-CoA thioesterase 7	-0.13	1	0	0	1	0	0	0	0
PCGF3	polycomb group ring finger 3	-0.13	1	1	0	0	0	0	0	0
PURB	purine-rich element binding protein B	-0.13	2	0	1	1	1	0	0	1
LOC153364	similar to metallo-beta-lactamase superfamily protein	-0.13	1	0	0	1	0	0	0	0
AKAP2	A kinase (PRKA) anchor protein 2	-0.13	1	0	0	1	1	1	0	0
PALM2-AKAP2	PALM2-AKAP2 protein	-0.13	1	0	0	1	1	1	0	0
TFE3	transcription factor binding to IGHM enhancer 3	-0.13	1	0	1	0	0	0	0	0
YTHDF3	YTH domain family, member 3	-0.13	1	0	1	0	0	0	0	0
ACVR2B	activin A receptor, type IIB	-0.13	2	0	0	2	0	0	0	0
TLK2	tousled-like kinase 2	-0.13	1	0	1	0	0	0	0	0
PLXDC2	plexin domain containing 2	-0.13	1	0	0	1	0	0	0	0
CSNK1G3	casein kinase 1, gamma 3	-0.13	1	0	0	1	0	0	0	0
TBL1XR1	transducin (beta)-like 1X-linked receptor 1	-0.13	1	0	1	0	1	0	0	1
AMBN	ameloblastin (enamel matrix protein)	-0.13	1	0	1	0	0	0	0	0
SLITRK6	SLIT and NTRK-like family, member 6	-0.13	1	0	0	1	0	0	0	0
CHSY-2	chondroitin synthase-2	-0.13	1	0	0	1	0	0	0	0
VKORC1L1	vitamin K epoxide reductase complex, subunit 1-like 1	-0.12	1	0	0	1	0	0	0	0
PDE4D	phosphodiesterase 4D, cAMP-specific (phosphodiesterase E3 dunce homolog, Drosophila)	-0.12	1	0	0	1	0	0	0	0
MYH10	myosin, heavy chain 10, non-muscle	-0.12	1	0	0	1	0	0	0	0
RBPJ	recombination signal binding protein for immunoglobulin kappa J region	-0.12	1	0	0	1	0	0	0	0
PDCD4	programmed cell death 4 (neoplastic transformation inhibitor)	-0.12	1	0	0	1	0	0	0	0
ZFHX4	zinc finger homeodomain 4	-0.12	1	0	0	1	0	0	0	0
CSDE1	cold shock domain containing E1, RNA-binding	-0.12	1	0	0	1	0	0	0	0
IGF1	insulin-like growth factor 1 (somatomedin C)	-0.12	1	0	0	1	1	0	0	1
GRB2	growth factor receptor-bound protein 2	-0.12	1	1	0	0	0	0	0	0
ABCC5	ATP-binding cassette, sub-family C (CFTR/MRP), member 5	-0.12	1	0	0	1	0	0	0	0
ADCY3	adenylate cyclase 3	-0.12	1	0	0	1	0	0	0	0
ZC3H11A	zinc finger CCCH-type containing 11A	-0.12	1	0	0	1	0	0	0	0
CDKN1C	cyclin-dependent kinase inhibitor 1C (p57, Kip2)	-0.12	1	0	0	1	0	0	0	0
C16orf28	chromosome 16 open reading frame 28	-0.12	1	0	0	1	0	0	0	0
JAZF1	JAZF zinc finger 1	-0.12	1	0	0	1	0	0	0	0
PCDH9	protocadherin 9	-0.12	1	0	0	1	0	0	0	0
POU2F2	POU domain, class 2, transcription factor 2	-0.12	1	0	0	1	0	0	0	0
TRIM41	tripartite motif-containing 41	-0.12	1	0	1	0	0	0	0	0
2'-PDE	2'-phosphodiesterase	-0.12	1	0	0	1	0	0	0	0
EDNRB	endothelin receptor type B	-0.12	1	0	0	1	1	0	0	1
CNOT6L	CCR4-NOT transcription complex, subunit 6-like	-0.11	2	0	0	2	3	0	2	1
SMARCA2	SWI/SNF related, matrix associated, actin dependent regulator of chromatin, subfamily a, member 2	-0.11	1	0	0	1	0	0	0	0
CACNA1E	calcium channel, voltage-dependent, R type, alpha 1E subunit	-0.11	1	0	1	0	0	0	0	0
DNAJA2	DnaJ (Hsp40) homolog, subfamily A, member 2	-0.11	1	0	0	1	0	0	0	0
PRKAB2	protein kinase, AMP-activated, beta 2 non-catalytic subunit	-0.11	1	0	0	1	0	0	0	0
CTF8	chromosome transmission fidelity factor 8 homolog (S. cerevisiae)	-0.11	1	0	1	0	0	0	0	0
DDX3X	DEAD (Asp-Glu-Ala-Asp) box polypeptide 3, X-linked	-0.11	1	0	0	1	0	0	0	0
LMAN1	lectin, mannose-binding, 1	-0.11	1	0	0	1	0	0	0	0
RAD9A	RAD9 homolog A (S. pombe)	-0.11	1	0	1	0	0	0	0	0
E2F1	E2F transcription factor 1	-0.11	1	0	0	1	0	0	0	0
ETS2	v-ets erythroblastosis virus E26 oncogene homolog 2 (avian)	-0.11	1	0	0	1	0	0	0	0
GMFB	glia maturation factor, beta	-0.11	1	0	0	1	0	0	0	0
SAT1	spermidine/spermine N1-acetyltransferase 1	-0.11	1	0	0	1	0	0	0	0
CALN1	calneuron 1	-0.11	1	0	1	0	1	0	1	0
WDR1	WD repeat domain 1	-0.11	1	0	0	1	0	0	0	0
STK4	serine/threonine kinase 4	-0.11	1	0	0	1	0	0	0	0
TNFRSF21	tumor necrosis factor receptor superfamily, member 21	-0.11	1	0	1	0	0	0	0	0
SMARCC1	SWI/SNF related, matrix associated, actin dependent regulator of chromatin, subfamily c, member 1	-0.1	1	0	0	1	0	0	0	0
PLK2	polo-like kinase 2 (Drosophila)	-0.1	1	0	1	0	0	0	0	0
SEC24A	SEC24 related gene family, member A (S. cerevisiae)	-0.1	1	0	0	1	0	0	0	0
TGFBR2	transforming growth factor, beta receptor II (70/80kDa)	-0.1	1	0	0	1	0	0	0	0
PLAG1	pleiomorphic adenoma gene 1	-0.1	1	0	1	0	0	0	0	0
LUC7L2	LUC7-like 2 (S. cerevisiae)	-0.1	1	0	1	0	0	0	0	0
BICD2	bicaudal D homolog 2 (Drosophila)	-0.1	1	0	0	1	1	0	0	1
PID1	phosphotyrosine interaction domain containing 1	-0.1	1	0	0	1	0	0	0	0
VPS4B	vacuolar protein sorting 4 homolog B (S. cerevisiae)	-0.1	1	0	0	1	0	0	0	0
EMR4	egf-like module containing, mucin-like, hormone receptor-like 4	-0.1	1	0	1	0	0	0	0	0
BAHD1	bromo adjacent homology domain containing 1	-0.1	1	1	0	0	0	0	0	0
EPB41L5	erythrocyte membrane protein band 4.1 like 5	-0.1	1	0	0	1	0	0	0	0
TRIM36	tripartite motif-containing 36	-0.09	1	0	0	1	0	0	0	0
SYT6	synaptotagmin VI	-0.09	1	0	0	1	0	0	0	0
TSC22D3	TSC22 domain family, member 3	-0.09	1	0	1	0	0	0	0	0
HS6ST2	heparan sulfate 6-O-sulfotransferase 2	-0.09	1	0	0	1	0	0	0	0
RPS6KB1	ribosomal protein S6 kinase, 70kDa, polypeptide 1	-0.09	1	0	0	1	0	0	0	0
SOX9	SRY (sex determining region Y)-box 9 (campomelic dysplasia, autosomal sex-reversal)	-0.09	1	0	0	1	0	0	0	0
PHF8	PHD finger protein 8	-0.09	1	0	1	0	0	0	0	0
PHF6	PHD finger protein 6	-0.09	1	0	0	1	1	0	1	0
CALM3	calmodulin 3 (phosphorylase kinase, delta)	-0.09	1	0	1	0	0	0	0	0
KCNJ2	potassium inwardly-rectifying channel, subfamily J, member 2	-0.09	1	0	0	1	0	0	0	0
MYO10	myosin X	-0.08	1	0	0	1	0	0	0	0
CACNA1C	calcium channel, voltage-dependent, L type, alpha 1C subunit	-0.08	1	0	0	1	2	0	2	0
KCTD9	potassium channel tetramerisation domain containing 9	-0.08	1	0	0	1	0	0	0	0
CPA3	carboxypeptidase A3 (mast cell)	-0.08	1	0	0	1	0	0	0	0
TAC3	tachykinin 3 (neuromedin K, neurokinin beta)	-0.08	1	0	1	0	0	0	0	0
AUTS2	autism susceptibility candidate 2	-0.08	1	0	0	1	0	0	0	0
SLC25A12	solute carrier family 25 (mitochondrial carrier, Aralar), member 12	-0.08	1	0	0	1	0	0	0	0
INSM1	insulinoma-associated 1	-0.08	1	0	0	1	0	0	0	0
OXSR1	oxidative-stress responsive 1	-0.08	1	0	0	1	0	0	0	0
MPP5	membrane protein, palmitoylated 5 (MAGUK p55 subfamily member 5)	-0.08	1	0	0	1	0	0	0	0
EIF5A2	eukaryotic translation initiation factor 5A2	-0.07	1	0	0	1	0	0	0	0
MLSTD2	male sterility domain containing 2	-0.07	1	0	0	1	1	0	0	1
POU3F1	POU domain, class 3, transcription factor 1	-0.07	1	0	0	1	0	0	0	0
C3orf59	chromosome 3 open reading frame 59	-0.07	1	0	0	1	0	0	0	0
PPP1CB	protein phosphatase 1, catalytic subunit, beta isoform	-0.07	1	0	0	1	0	0	0	0
NUFIP2	nuclear fragile X mental retardation protein interacting protein 2	-0.07	1	0	0	1	0	0	0	0
SFMBT1	Scm-like with four mbt domains 1	-0.07	1	0	0	1	0	0	0	0
MAGI2	membrane associated guanylate kinase, WW and PDZ domain containing 2	-0.07	1	0	0	1	0	0	0	0
HDAC4	histone deacetylase 4	-0.07	1	0	1	0	0	0	0	0
EPN2	epsin 2	-0.07	1	0	0	1	0	0	0	0
NCDN	neurochondrin	-0.07	1	0	1	0	0	0	0	0
PHTF2	putative homeodomain transcription factor 2	-0.07	1	0	0	1	0	0	0	0
STIM2	stromal interaction molecule 2	-0.07	1	0	0	1	0	0	0	0
MECP2	methyl CpG binding protein 2 (Rett syndrome)	-0.07	1	0	1	0	1	0	1	0
ATBF1	AT-binding transcription factor 1	-0.06	1	0	0	1	1	0	0	1
KIAA0672	KIAA0672 gene product	-0.06	1	0	1	0	0	0	0	0
KBTBD2	kelch repeat and BTB (POZ) domain containing 2	-0.06	1	0	0	1	0	0	0	0
KIAA0310	KIAA0310	-0.06	1	0	0	1	0	0	0	0
LANCL1	LanC lantibiotic synthetase component C-like 1 (bacterial)	-0.06	1	0	0	1	0	0	0	0
ZFP36L1	zinc finger protein 36, C3H type-like 1	-0.06	1	0	0	1	0	0	0	0
PPP2R5B	protein phosphatase 2, regulatory subunit B', beta isoform	-0.06	1	0	1	0	0	0	0	0
HSPB6	heat shock protein, alpha-crystallin-related, B6	-0.06	1	0	1	0	0	0	0	0
ATP5G1	ATP synthase, H+ transporting, mitochondrial F0 complex, subunit C1 (subunit 9)	-0.06	1	0	0	1	0	0	0	0
DPYSL3	dihydropyrimidinase-like 3	-0.06	1	0	0	1	0	0	0	0
ID4	inhibitor of DNA binding 4, dominant negative helix-loop-helix protein	-0.06	1	0	0	1	0	0	0	0
LCOR	ligand dependent nuclear receptor corepressor	-0.05	1	0	0	1	0	0	0	0
SON	SON DNA binding protein	-0.05	1	0	1	0	0	0	0	0
PLCG1	phospholipase C, gamma 1	-0.05	1	0	0	1	0	0	0	0
ZMIZ1	zinc finger, MIZ-type containing 1	-0.05	1	0	0	1	0	0	0	0
HIPK1	homeodomain interacting protein kinase 1	-0.05	1	0	1	0	0	0	0	0
CRK	v-crk sarcoma virus CT10 oncogene homolog (avian)	-0.05	1	0	0	1	0	0	0	0
BCL11B	B-cell CLL/lymphoma 11B (zinc finger protein)	-0.04	1	0	0	1	0	0	0	0
USP20	ubiquitin specific peptidase 20	-0.04	1	0	1	0	0	0	0	0
C9orf58	chromosome 9 open reading frame 58	-0.04	1	0	0	1	0	0	0	0
BTBD3	BTB (POZ) domain containing 3	-0.04	1	0	1	0	0	0	0	0
LPHN1	latrophilin 1	-0.04	1	0	1	0	0	0	0	0
DNAJC16	DnaJ (Hsp40) homolog, subfamily C, member 16	-0.03	1	0	0	1	0	0	0	0
HIC2	hypermethylated in cancer 2	-0.03	1	0	0	1	0	0	0	0
TSPYL5	TSPY-like 5	-0.03	1	0	1	0	1	0	1	0
ETF1	eukaryotic translation termination factor 1	-0.03	1	0	0	1	0	0	0	0
DCUN1D3	DCN1, defective in cullin neddylation 1, domain containing 3 (S. cerevisiae)	-0.03	1	0	1	0	0	0	0	0
NLGN3	neuroligin 3	-0.03	1	0	0	1	0	0	0	0
TARDBP	TAR DNA binding protein	-0.03	1	0	0	1	0	0	0	0
TNFRSF19L	tumor necrosis factor receptor superfamily, member 19-like	-0.03	1	0	0	1	1	0	0	1
CNBP	CCHC-type zinc finger, nucleic acid binding protein	-0.03	1	0	0	1	0	0	0	0
PIK3R1	phosphoinositide-3-kinase, regulatory subunit 1 (p85 alpha)	-0.03	1	0	0	1	0	0	0	0
B3GNT1	UDP-GlcNAc:betaGal beta-1,3-N-acetylglucosaminyltransferase 1	-0.03	1	0	0	1	0	0	0	0
OTUD7B	OTU domain containing 7B	-0.02	1	0	0	1	0	0	0	0
AFF2	AF4/FMR2 family, member 2	-0.01	1	0	0	1	0	0	0	0
UBE2Z	ubiquitin-conjugating enzyme E2Z (putative)	-0.01	1	0	0	1	0	0	0	0
ATXN1	ataxin 1	-0.01	1	0	1	0	0	0	0	0
TMEM25	transmembrane protein 25	0	1	0	0	1	0	0	0	0
RSBN1	round spermatid basic protein 1	0	1	0	0	1	0	0	0	0
TRIM2	tripartite motif-containing 2	0.01	1	0	0	1	0	0	0	0
HS6ST3	heparan sulfate 6-O-sulfotransferase 3	0.06	1	0	0	1	0	0	0	0
ADAM10	ADAM metallopeptidase domain 10	NA	1	0	1	0	0	0	0	0
GPBP1	GC-rich promoter binding protein 1	NA	1	1	0	0	0	0	0	0
